# Supplementary material
Source: publisher figshare collection journal article supplement (https://karger.figshare.com/articles/dataset/_/24961431)
Supplement: Supplementary file 1 [file 1]

**Supplemental Figure 1: All H&E stained SVG sections.** All H&E stained sections with whole vessels shown in 4x, 20x and 60x magnification (n=6). Blue and yellow boxes show the magnified area on the preceding image. Green boxes indicate samples used in Figure 1.

**Supplemental Figure 2: All Movat Pentachrome stained SVG sections.** All Pentachrome stained sections with whole vessels shown in 4x, 20x and 60x magnification (n=6). Blue and yellow boxes show the magnified area on the preceding image. Green boxes indicate samples used in Figure 1.

**Supplemental Figure 3: All VE-cadherin stained samples.** Each image was taken on 20x magnification with VE-cadherin in pink and DAPI in blue. For each patient, the left image shows the entirety of the stained vessel with a pink box to indicate the area of the enhanced magnification to the right. Green boxes indicate images used in Figure 2.

**Supplemental Figure 4: All eNOS stained samples.** Each image was taken on 20x magnification with eNOS in pink and DAPI in blue. For each patient, the left image shows the entirety of the stained vessel with a pink box to indicate the area of the enhanced magnification to the right. Green boxes indicate images used in Figure 2.

**Supplemental Figure 5: All 4HNE stained samples.** Each image was taken on 20x magnification with 4HNE in pink and DAPI in blue. For each patient, the left image shows the entirety of the stained vessel with a pink box to indicate the area of the enhanced magnification to the right. Green boxes indicate images used in Figure 3. Staining specificity was confirmed using secondary only control staining.

**Supplemental Figure 6: All NRF2 stained samples.** Each image was taken on 20x magnification with 4HNE in green and DAPI in blue. For each patient, the left image shows the entirety of the

stained vessel with a pink box to indicate the area of the enhanced magnification to the right. Green boxes indicate images used in Figure 3. Staining specificity was confirmed using secondary only control staining.
